# Supplementary material
Source: PubMed Central journal article supplement (PMC2708890)
Supplement: supp_M900418200_Suppfigure.pdf [file supp_M900418200_Suppfigure.pdf]

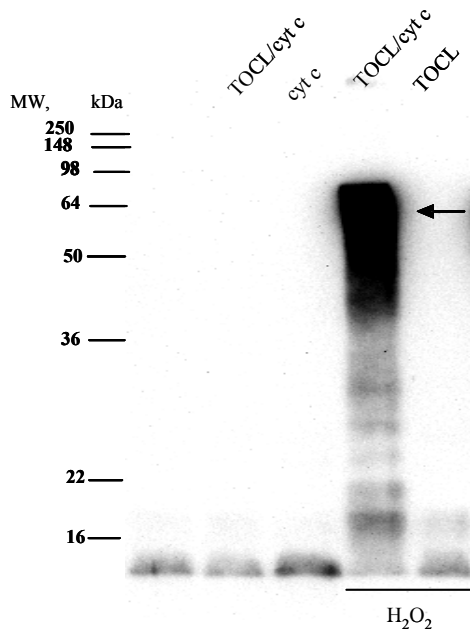

**Fig. S1.** Aggregation of  $\beta$ -amyloid peptide (A $\beta$ 1-42) in the presence of *cyt c*/TOCL/  $H_2O_2$  analyzed by SDS-PAGE with subsequent Western blotting (staining with anti- $\beta$ -amyloid peptide antibody). Accumulation of covalently cross-linked hetero-oligomers was observed when A $\beta$  and *cyt c* plus TOCL were incubated in the presence of  $H_2O_2$  (lane 4, arrow). Conditions: A $\beta$  (2  $\mu$ M) was incubated with *cyt c* (2  $\mu$ M) and TOCL/DOPC liposomes (50  $\mu$ M, TOCL/*cyt c* ratio 25:1) for 60 min at 37°C.  $H_2O_2$  (50  $\mu$ M) was added every 15 min. Excess  $H_2O_2$  was removed by the addition of catalase (1400 units/ml catalase). A typical gel representative of three experiments is shown.
