# Supplementary material
Source: PubMed Central journal article supplement (PMC2708890)
Supplement: supp_M900418200_Supptable.pdf [file supp_M900418200_Supptable.pdf]

**Table 1.** Demographic information for the PD patients

|        | <b>Age</b> | <b>Gender</b> | <b>Cause of death</b>     | <b>Postmortem time (h)</b> | <b>McKeith score</b> | <b>Braak tangle score</b> |
|--------|------------|---------------|---------------------------|----------------------------|----------------------|---------------------------|
| Case 1 | 79         | M             | Pneumonia                 | 13                         | 10                   | 2                         |
| Case 2 | 76         | F             | Hip fracture<br>Pneumonia | 8                          | 10                   | 2                         |
| Case 3 | 83         | M             | Atherosclerotic disease   | 10                         | 8                    | 3                         |
| Case 4 | 68         | M             | Unknown                   | 9                          | 10                   | 4                         |
